# Supplementary material for: Estetrol Is Safe and Well Tolerated during Treatment of Hospitalized Men and Women with Moderate COVID-19 in a Randomized, Double-Blind Study
Source: MDPI journal article supplement (doi:10.3390/jcm12123928), 2023-06-08
Supplement: s1 [file s1]

## Supplementary Materials

|                                                                                                                              |   |
|------------------------------------------------------------------------------------------------------------------------------|---|
| Table S1 - WHO Ordinal Scale for Clinical Improvement .....                                                                  | 1 |
| Table S2 - Current Study and Other Randomized-Controlled Design Interventions Including Hospitalized Moderate COVID 19 ..... | 2 |
| Table S3 - Estrogen Studies in COVID-19 Recruiting Both Female and Male Patients.....                                        | 8 |

*Table S1. WHO Ordinal Scale for Clinical Improvement*

| Patient State            | Descriptor                                                                             | Score |
|--------------------------|----------------------------------------------------------------------------------------|-------|
| Uninfected               | Uninfected; no viral RNA detected                                                      | 0     |
| Ambulatory, mild disease | Asymptomatic, viral RNA detected                                                       | 1     |
|                          | Symptomatic, independent                                                               | 2     |
|                          | Symptomatic, assistance needed                                                         | 3     |
| Hospitalized             |                                                                                        |       |
| Moderate disease         | Hospitalized, no oxygen therapy                                                        | 4     |
| Moderate disease         | Oxygen by mask or nasal prongs                                                         | 5     |
| Severe disease           | Non-invasive ventilation or high-flow oxygen                                           | 6     |
| Severe disease           | Intubation and mechanical ventilation, $pO_2/FiO_2 \geq 150$ or $SpO_2/FiO_2 \geq 200$ | 7     |
| Severe disease           | Mechanical ventilation $pO_2/FiO_2 < 150$ ( $SpO_2/FiO_2 < 200$ ) or vasopressin       | 8     |
| Severe disease           | Mechanical ventilation $pO_2/FiO_2 < 150$ and vasopressin, dialysis, or ECMO           | 9     |
| Dead                     | Death                                                                                  | 10    |

COVID-19: Coronavirus disease 2019; ECMO: extracorporeal membrane oxygenation;  $FiO_2$ : fraction of inspired oxygen;  $pO_2$ : oxygen partial pressure; RNA: ribonucleic acid;  $SpO_2$ : oxygen saturation; WHO: World Health Organization.

WHO Working Group on the Clinical Characterisation and Management of COVID-19 infection. A minimal common out-come measure set for COVID-19 clinical research (published correction appears in Lancet Infect Dis. 2020 Oct;20(10):e250). Lancet Infect Dis. 2020;20(8):e192-e197. doi:10.1016/S1473-3099(20)30483-7 [13]

**Table S2. Current Study and Other Randomized-Controlled Design Interventions Including Hospitalized Moderate COVID 19**

| Study                 | Treatment                                                                                            | n                                 | Outcomes                                                                         | Results                                                                                                    | Study Limitations                                                                                                                                                                                          |
|-----------------------|------------------------------------------------------------------------------------------------------|-----------------------------------|----------------------------------------------------------------------------------|------------------------------------------------------------------------------------------------------------|------------------------------------------------------------------------------------------------------------------------------------------------------------------------------------------------------------|
| E4                    |                                                                                                      |                                   |                                                                                  |                                                                                                            |                                                                                                                                                                                                            |
| (current study)       | E4 15 mg <i>versus</i> placebo for 21 days                                                           | 87 (E4)<br>88 (placebo)           | <b>Primary:</b> Percentage patients recovered at Day 28 Discharged (WHO OSCI <3) | E4: 70/85 (82.4%)<br>Placebo: 79/86 (91.9%)                                                                |                                                                                                                                                                                                            |
|                       |                                                                                                      |                                   | Patients recovered by Day 14 (WHO OSCI <3)                                       | E4: 51/85 (60.0%)<br>Placebo: 52/86 (60.5%)                                                                |                                                                                                                                                                                                            |
|                       |                                                                                                      |                                   | Percentage of patients with WHO OSCI >6 at Day 28                                | E4: 10/85 (11.8%)<br>Placebo: 6/86 (7.0%)                                                                  |                                                                                                                                                                                                            |
|                       |                                                                                                      |                                   | Time to recovery defined as time to a score of ≤3 on the WHO OSCI scale          | E4: 13 days (CI 95% 12-14) Placebo: 12 days (CI 95% 11-14)                                                 |                                                                                                                                                                                                            |
|                       |                                                                                                      |                                   |                                                                                  |                                                                                                            |                                                                                                                                                                                                            |
| Remdesivir            |                                                                                                      |                                   |                                                                                  |                                                                                                            |                                                                                                                                                                                                            |
| ACCT1 (Oct 2020) [14] | Remdesivir 200 mg IV on Day 1, then 100 mg IV once daily for up to 9 more days <i>versus</i> placebo | 541 (remdesivir)<br>521 (placebo) | <b>Primary:</b> Time to clinical recovery                                        | Remdesivir: 10 days<br>Placebo: 15 days<br>Rate ratio for recovery 1.29; 95% CI 1.12–1.49; <i>p</i> <0.001 | Wide range of disease severity among patients; study not powered to detect differences within subgroups; study not powered to detect differences in mortality between arms; no data on long-term morbidity |
|                       |                                                                                                      |                                   | Improvement in clinical status at Day 15                                         | More likely in remdesivir arm than placebo (OR 1.5; 95% CI 1.2–1.9; <i>p</i> <0.001)                       |                                                                                                                                                                                                            |
|                       |                                                                                                      |                                   | Mortality by Day 29                                                              | Remdesivir: 11.4%<br>Placebo: 15.2%<br>HR 0.73; 95% CI, 0.52 to 1.03                                       |                                                                                                                                                                                                            |
| CATCO (Jan 2022) [20] | Remdesivir 200 mg IV on Day 0, then 100 mg                                                           | 634 (remdesivir)<br>647 (SOC)     | In-hospital mortality                                                            | Remdesivir: 18.7%<br>SOC: 22.6%<br>RR 0.83; 95% CI 0.67–1.03                                               | Open-label study; information on comorbidities was not available for 26% of patients                                                                                                                       |

|                                |                                                                                                                                                                    |                                                                  |                                                                       |                                                                                                                                                                           |                                                                                                                                          |
|--------------------------------|--------------------------------------------------------------------------------------------------------------------------------------------------------------------|------------------------------------------------------------------|-----------------------------------------------------------------------|---------------------------------------------------------------------------------------------------------------------------------------------------------------------------|------------------------------------------------------------------------------------------------------------------------------------------|
|                                | IV once daily on Days 1–9 <i>versus</i> local SOC                                                                                                                  |                                                                  | New need for mechanical ventilation                                   | Remdesivir: 8%<br>SOC: 15%<br>RR 0.53; 95% CI 0.38–0.75                                                                                                                   |                                                                                                                                          |
|                                |                                                                                                                                                                    |                                                                  | Hospital length of stay                                               | No significant difference                                                                                                                                                 |                                                                                                                                          |
| Discovery (Sep 21) [21]        | Remdesivir 200 mg IV on Day 1, 100 mg IV once daily for up to 9 days <i>versus</i> SOC                                                                             | 429 (remdesivir)<br>428 (SOC)                                    | <b>Primary:</b> Clinical status at Day 15                             | No difference between arms (OR 0.98; 95% CI 0.77–1.25; $p=0.85$ )                                                                                                         | Open-label study; 440 participants in this study also enrolled in the WHO Solidarity study                                               |
|                                |                                                                                                                                                                    |                                                                  | Mortality by Day 29                                                   | Remdesivir: 8%<br>SOC: 9%                                                                                                                                                 |                                                                                                                                          |
| WHO Solidarity (Oct 2022) [22] | Remdesivir 200 mg IV on Day 1, 100 mg IV once daily for up to 9 days <i>versus</i> SOC                                                                             | 4146 (remdesivir)<br>4129 (local SOC)                            | <b>Primary:</b> In-hospital mortality                                 | Remdesivir: 14.5%<br>SOC: 15.6%<br>Rate ratio 0.91; 95% CI 0.82–1.02; $p=0.12$                                                                                            | Open-label study; no data on time from symptom onset to enrollment                                                                       |
|                                |                                                                                                                                                                    |                                                                  | Initiation mechanical ventilation                                     | Remdesivir: 14.1%<br>SOC: 15.7%<br>Rate ratio 0.88; 95% CI 0.77–1.00; $p=0.04$                                                                                            |                                                                                                                                          |
| Spinner et al (Sep 2020) [23]  | Remdesivir 200 mg IV on Day 1, then 100 mg IV once daily for 9 days or remdesivir 200 mg IV on Day 1, then 100 mg IV once daily for 4 days <i>versus</i> local SOC | 193 (remdesivir 10 days)<br>191 (remdesivir 5 days)<br>200 (SOC) | <b>Primary:</b> Clinical status at Day 11 measured by WHO OSCI        | Significantly better in 5-day remdesivir arm than in SOC arm (OR 1.65; 95% CI 1.09–2.48; $p=0.02$ ); no difference between 10-day remdesivir arm and SOC arm ( $p=0.18$ ) | Open-label study                                                                                                                         |
| Goldman et al (May 2020) [24]  | Remdesivir 200 mg IV on Day 1, then 100 mg IV once daily for 4 days <i>versus</i> remdesivir 200 mg IV on Day 1, then 100 mg IV once daily for 9 days              | 200 (remdesivir 10 days)<br>197 (remdesivir 5 days)              | <b>Primary:</b> Clinical status at Day 14, as measured by an WHO OSCI | Proportion with clinical improvement at Day 14: 64% in 5-day remdesivir arm vs 54% in 10-day remdesivir arm ( $p=0.14$ )                                                  | Open-label study; lack of placebo arm; baseline imbalances in clinical status of patients in 5-day remdesivir and 10-day remdesivir arms |

| Dexamethasone              |                                                                                                              |                                          |                                                                       |                                                                                                   |                                                                                                                                                                                                                                                                                                                                                                                                                                                                                                                                                                                                                                                                                                                        |
|----------------------------|--------------------------------------------------------------------------------------------------------------|------------------------------------------|-----------------------------------------------------------------------|---------------------------------------------------------------------------------------------------|------------------------------------------------------------------------------------------------------------------------------------------------------------------------------------------------------------------------------------------------------------------------------------------------------------------------------------------------------------------------------------------------------------------------------------------------------------------------------------------------------------------------------------------------------------------------------------------------------------------------------------------------------------------------------------------------------------------------|
| RECOVER Y (Feb 2021) [25]  | Dexamethasone 6 mg IV or PO once daily plus SOC for up to 10 days or until discharge <i>versus</i> SOC alone | 2104 (dexamethasone + SOC)<br>4321 (SOC) | <b>Primary:</b> All-cause mortality at 28 days                        | Dexamethasone: 23%<br>SOC: 26%<br>Age-adjusted rate ratio 0.83; 95% CI 0.75–0.93; <i>p</i> <0.001 | Open-label study; published data did not include results for key secondary endpoints (e.g., cause-specific mortality, need for renal replacement), AEs, and key subgroups (e.g., patients with comorbidities); patients who required supplemental oxygen (but not MV) had variable severity of illness, and it is unclear whether all patients in this subgroup benefited from dexamethasone or whether benefit is restricted to those requiring higher levels of supplemental oxygen; patients aged >80 years were preferentially assigned to receive supplemental oxygen therapy (and not MV); high mortality in this study may limit the generalizability of results to populations with a lower baseline mortality |
|                            |                                                                                                              |                                          | Patients who required MV or ECMO at randomization                     | Dexamethasone: 29%<br>SOC: 41%<br>Rate ratio 0.64; 95% CI 0.51–0.81                               |                                                                                                                                                                                                                                                                                                                                                                                                                                                                                                                                                                                                                                                                                                                        |
|                            |                                                                                                              |                                          | Patients who required supplemental oxygen but not MV at randomization | Dexamethasone: 23%<br>SOC: 26%<br>Rate ratio 0.82; 95% CI 0.72–0.94                               |                                                                                                                                                                                                                                                                                                                                                                                                                                                                                                                                                                                                                                                                                                                        |
|                            |                                                                                                              |                                          | Patients who did not require supplemental oxygen at randomization:    | Dexamethasone: 18%<br>SOC: 14%<br>Rate ratio 1.19, 95% CI 0.92–1.55                               |                                                                                                                                                                                                                                                                                                                                                                                                                                                                                                                                                                                                                                                                                                                        |
|                            |                                                                                                              |                                          |                                                                       |                                                                                                   |                                                                                                                                                                                                                                                                                                                                                                                                                                                                                                                                                                                                                                                                                                                        |
| Baricitinib                |                                                                                                              |                                          |                                                                       |                                                                                                   |                                                                                                                                                                                                                                                                                                                                                                                                                                                                                                                                                                                                                                                                                                                        |
| RECOVER Y (July 2022) [26] | Baricitinib 4 mg PO daily for 10 days or until discharge (whichever comes first) <i>versus</i> SOC           | 4148 (baricitinib)<br>4008 (SOC)         | 28-day mortality                                                      | Baricitinib: 12%<br>SOC: 14%<br>Age-adjusted rate ratio 0.87; 95% CI 0.77–0.98; <i>p</i> =0.028   | Open-label study                                                                                                                                                                                                                                                                                                                                                                                                                                                                                                                                                                                                                                                                                                       |
|                            |                                                                                                              |                                          | Discharge within 28 days                                              | Baricitinib: 80%<br>SOC: 78%                                                                      |                                                                                                                                                                                                                                                                                                                                                                                                                                                                                                                                                                                                                                                                                                                        |

|                             |                                                                                                                                                            |                                                      |                                                                     |                                                                                           |                                                                                                                              |
|-----------------------------|------------------------------------------------------------------------------------------------------------------------------------------------------------|------------------------------------------------------|---------------------------------------------------------------------|-------------------------------------------------------------------------------------------|------------------------------------------------------------------------------------------------------------------------------|
|                             |                                                                                                                                                            |                                                      |                                                                     | Age-adjusted rate ratio 1.10; 95% CI 1.04–1.15; $p=0.0002$                                |                                                                                                                              |
|                             |                                                                                                                                                            |                                                      | Median time to discharge                                            | 8 days in both arms                                                                       |                                                                                                                              |
|                             |                                                                                                                                                            |                                                      | Composite of MV, ECMO, or death                                     | Baricitinib: 16%<br>SOC: 17%<br>Age-adjusted risk ratio 0.89; 95% CI 0.81–0.98; $p=0.016$ |                                                                                                                              |
| COV Barrier (Sep 2021) [27] | Baricitinib 4 mg PO once daily for up to 14 days <i>versus</i> placebo                                                                                     | 764 (baricitinib)<br>761 (placebo)                   | Clinical progression or death by Day 28                             | Baricitinib: 28%<br>Placebo: 31%<br>OR 0.85; 95% CI 0.67–1.08; $p=0.18$                   | Results from the ACTT-2 study prompted a protocol amendment limiting enrollment to participants who required baseline oxygen |
|                             |                                                                                                                                                            |                                                      | Mortality by Day 28                                                 | Baricitinib: 8%<br>Placebo: 13%<br>HR 0.57; 95% CI 0.41–0.78; $p=0.0018$                  |                                                                                                                              |
|                             |                                                                                                                                                            |                                                      | Mortality by Day 28 for those receiving corticosteroids at baseline | Baricitinib: 9%<br>Placebo: 14%<br>HR 0.63; 95% CI 0.45–0.89; $p=0.017$                   |                                                                                                                              |
| Kalil et al (Mar 2021) [28] | Baricitinib 4 mg PO once daily for 14 days or until discharge, plus RDV for 10 days or until discharge (n = 515), <i>versus</i> placebo plus RDV (n = 518) | 515 (baricitinib plus SOC)<br>518 (placebo plus RDV) | Time to recovery by Day 28                                          | Baricitinib: 7 days<br>Placebo: 8 days<br>Rate ratio 1.16; 95% CI 1.01–1.32; $p=0.03$     | Not powered to detect difference in mortality between arms; steroids not part of SOC                                         |
|                             |                                                                                                                                                            |                                                      | Improvement in clinical status at Day 15                            | Greater in baricitinib arm than placebo arm (OR 1.3; 95% CI 1.0–1.6)                      |                                                                                                                              |
|                             |                                                                                                                                                            |                                                      | Mortality at Day 28                                                 | Baricitinib: 5%<br>Placebo: 8%<br>HR 0.65; 95% CI 0.39–1.09                               |                                                                                                                              |
| <b>Tocilizumab</b>          |                                                                                                                                                            |                                                      |                                                                     |                                                                                           |                                                                                                                              |
|                             | 1 weight-based dose of tocilizumab                                                                                                                         |                                                      | <b>Primary:</b> 28-day all-cause mortality                          | Tocilizumab: 31%<br>Usual care: 35%                                                       | Arbitrary CRP $\geq 75$ mg/L cutoff for enrollment; difficult to define                                                      |

|                                |                                                                                                              |                                                            |                                                                                  |                                                                                          |                                                                                                                                                      |
|--------------------------------|--------------------------------------------------------------------------------------------------------------|------------------------------------------------------------|----------------------------------------------------------------------------------|------------------------------------------------------------------------------------------|------------------------------------------------------------------------------------------------------------------------------------------------------|
| RECOVER<br>Y (May<br>21) [15]  | (maximum 800 mg)<br>with possible second<br>dose <i>versus</i> usual care                                    | 2022<br>(tocilizumab<br>plus SOC)<br>2094 (usual care)     |                                                                                  | Rate ratio 0.85; 95% CI 0.76–<br>0.94; $p=0.0028$                                        | exact subset of patients in<br>RECOVERY cohort who were<br>subsequently selected for<br>secondary<br>randomization/tocilizumab<br>study              |
|                                |                                                                                                              |                                                            | Proportion<br>discharged from<br>hospital within 28<br>days                      | Tocilizumab: 57%<br>Usual care: 50%<br>Rate ratio 1.22; 95% CI 1.12–<br>1.33; $p<0.0001$ |                                                                                                                                                      |
|                                |                                                                                                              |                                                            | Median time to<br>hospital discharge                                             | Tocilizumab: 9 days<br>Usual care: >28 days                                              |                                                                                                                                                      |
|                                |                                                                                                              |                                                            | Proportion not on<br>MV at baseline who<br>died or required MV<br>within 28 days | Tocilizumab: 35%<br>Usual care: 42%<br>Rate ratio 0.84; 95% CI 0.77–<br>0.92; $p<0.0001$ |                                                                                                                                                      |
| COVACT<br>A (Feb<br>2021) [16] | 1 dose of tocilizumab 8<br>mg/kg with possible<br>second dose plus SOC<br><i>versus</i> placebo plus<br>SOC  | 294<br>(tocilizumab)<br>144 (placebo<br>plus SOC)          | <b>Primary:</b> Clinical<br>status at Day 28, as<br>measured by an OS            | No significant difference between<br>arms in clinical status at Day 28<br>( $p=0.31$ )   | Modest power to detect<br>differences in Day 28 clinical<br>status; more patients received<br>corticosteroids in placebo arm<br>than tocilizumab arm |
|                                |                                                                                                              |                                                            | Median time to<br>hospital discharge:                                            | Tocilizumab: 20 days<br>Placebo: 28 days<br>HR 1.35; 95% CI 1.02–1.79                    |                                                                                                                                                      |
|                                |                                                                                                              |                                                            | Mortality by Day 28                                                              | Tocilizumab: 20%<br>Placebo: 19%<br>$p=0.94$                                             |                                                                                                                                                      |
| EMPACT<br>A (Dec<br>2020) [29] | 1 dose of tocilizumab 8<br>mg/kg with possible<br>second dose, plus SOC<br><i>versus</i> placebo plus<br>SOC | 249 (tocilizumab<br>plus SOC)<br>128 (placebo<br>plus SOC) | <b>Primary:</b> Proportion<br>who progressed to<br>MV                            | Tocilizumab: 12%<br>Placebo: 19%<br>HR 0.56; 95% CI 0.33–0.97; $p=0.04$                  | Moderate sample size                                                                                                                                 |
|                                |                                                                                                              |                                                            | Median time to<br>hospital discharge or<br>readiness for<br>discharge            | Tocilizumab: 6.0 days<br>Placebo: 7.5 days<br>HR 1.16; 95% CI 0.91–1.48                  |                                                                                                                                                      |
|                                |                                                                                                              |                                                            | All-cause mortality<br>by Day 28                                                 | Tocilizumab: 10.4%<br>Placebo: 8.6%                                                      |                                                                                                                                                      |

|                                 |                                                                                                                                                 |                                                         |                                                                                          |                                                                                                 |                                                                                                                                                                                                                                                                                                                   |
|---------------------------------|-------------------------------------------------------------------------------------------------------------------------------------------------|---------------------------------------------------------|------------------------------------------------------------------------------------------|-------------------------------------------------------------------------------------------------|-------------------------------------------------------------------------------------------------------------------------------------------------------------------------------------------------------------------------------------------------------------------------------------------------------------------|
| BACC<br>Bay (Oct<br>2020) [30]  | Tocilizumab 8 mg/kg<br>plus usual care <i>versus</i><br>placebo plus usual<br>care                                                              | 161<br>(tocilizumab)<br>81 (placebo plus<br>usual care) | <b>Primary:</b> Progression<br>to MV or death by<br>Day 28                               | Tocilizumab: 11%<br>Placebo: 13%<br>HR 0.83; 95% CI 0.38–1.81; <i>p</i> =0.64                   | Wide confidence intervals due to<br>small sample size and low event<br>rates; wide confidence intervals<br>due to small sample size and low<br>event rates; few patients received<br>remdesivir or corticosteroids                                                                                                |
|                                 |                                                                                                                                                 |                                                         | Proportion with<br>clinical worsening of<br>disease by Day 28                            | Tocilizumab: 19%<br>Placebo: 17%<br>HR 1.11; 95% CI 0.59–2.10; <i>p</i> =0.73                   |                                                                                                                                                                                                                                                                                                                   |
|                                 |                                                                                                                                                 |                                                         | Median time to<br>discontinuation of<br>oxygen                                           | Tocilizumab: 5.0 days<br>Placebo: 4.9 days<br><i>p</i> =0.69                                    |                                                                                                                                                                                                                                                                                                                   |
|                                 |                                                                                                                                                 |                                                         |                                                                                          |                                                                                                 |                                                                                                                                                                                                                                                                                                                   |
| REMDAC<br>TA (Nov<br>2021 [31]) | Up to 10 days of<br>remdesivir plus<br>tocilizumab 8 mg/kg<br>IV with second dose<br>within 8–24 hours if<br>indicated <i>versus</i><br>placebo | 434<br>(tocilizumab)<br>215 (placebo)                   | <b>Primary:</b> Time to<br>hospital discharge or<br>readiness for<br>discharge by Day 28 | 14 days in each arm (HR 0.97; 95% CI<br>0.78–1.19; <i>p</i> =0.74)                              | During the study, primary<br>outcome changed from clinical<br>status at Day 28 to time to<br>hospital discharge or readiness<br>for discharge by Day 28;<br>imbalances in patient<br>characteristics at baseline<br>between arms; possible<br>underrepresentation of patients<br>with rapidly progressive disease |
|                                 |                                                                                                                                                 |                                                         | Proportion who<br>required MV or died<br>by Day 28                                       | 29% in each arm; time to death not<br>evaluable (HR 0.98; 95% CI 0.72–<br>1.34; <i>p</i> =0.90) |                                                                                                                                                                                                                                                                                                                   |
|                                 |                                                                                                                                                 |                                                         | Mean ordinal score<br>for clinical status at<br>Day 14                                   | Tocilizumab: 2.8<br>Placebo: 2.9<br><i>p</i> =0.72                                              |                                                                                                                                                                                                                                                                                                                   |
|                                 |                                                                                                                                                 |                                                         | Proportion who died<br>by Day 28                                                         | Tocilizumab: 18%<br>Placebo: 20%                                                                |                                                                                                                                                                                                                                                                                                                   |
|                                 |                                                                                                                                                 |                                                         |                                                                                          |                                                                                                 |                                                                                                                                                                                                                                                                                                                   |

Note: The secondary endpoints included are chosen based on their relevance to other studies.

CI: confidence interval; CRP: C-reactive protein; ECMO: extracorporeal membrane oxygenation; HR: hazard ratio; IV: intravenous; MV: mechanical ventilation; n: number of patients in the treatment arm; OR: odds ratio; RR: relative risk; SOC: standard of care; WHO OSCI: World Health Organization Ordinal Scale of Clinical Improvement.

**Table S3.** *Estrogen Studies in COVID-19 Recruiting Both Female and Male Patients.*

| Title                                                             | EudraCT No. | Phase          | Treatment                                                                                                     | Recruitment status                                       | Results                                                                                                                                                                                                                                                                                                            |
|-------------------------------------------------------------------|-------------|----------------|---------------------------------------------------------------------------------------------------------------|----------------------------------------------------------|--------------------------------------------------------------------------------------------------------------------------------------------------------------------------------------------------------------------------------------------------------------------------------------------------------------------|
| Estrogen patch for COVID-19 symptoms [32]                         | NCT04359329 | 2              | E2 patch 100 mg/day for 7 days                                                                                | 2 subjects recruited                                     | No published results                                                                                                                                                                                                                                                                                               |
| Estrogen therapy in non-severe COVID-19 patients [33]             | NCT04539626 | Not applicable | Weekly EVRA patches (norelgestromin 6 mg/EE 0.60 mg) 1 patch placed every week for 21 days                    | 44 subjects recruited                                    | No published results                                                                                                                                                                                                                                                                                               |
| Oestrogen treatment for COVID-19 symptoms [34]                    | NCT04853069 | 2              | 17 $\beta$ -estradiol gel 3 mg/day for 10 days                                                                | Recruitment status unknown                               | No published results                                                                                                                                                                                                                                                                                               |
| Estradiol and progesterone in hospitalized COVID-19 patients [35] | NCT04865029 | 2              | E2 cypionate 5 mg/mL injection at admission and progesterone oral 200 mg/day for 5 days starting at admission | 10 subjects recruited (5 subjects in each treatment arm) | One fatality was reported in the placebo treatment arm. All participants except the patient who died, achieved a WHO OSCI score of 1–2 at discharge. The duration of hospital stay was shorter in the active treatment arm than in the placebo group (7.2 days [SD 5.18] versus 10.2 days [SD 7.53], respectively) |

COVID-19: Coronavirus disease 2019; E2: estradiol; EE: ethinyl estradiol; SD: standard deviation; WHO OSCI: World Health Organization Ordinal Scale of Clinical Improvement.
